# Supplementary material
Source: MDPI journal article supplement (https://www.mdpi.com/2673-4532/4/2/17)
Supplement: s1 [file s1]

# An Open-Source, Low-Cost Apparatus for Conductivity Measurements Based on Arduino and Coupled to a Handmade Cell

Giovanni Visco, Emanuele Dell'Aglia \*, Mauro Tomassetti, Luca Ugo Fontanella and Maria Pia Sammartino

Department of Chemistry, La Sapienza University of Rome, 00185 Rome, Italy;  
giovanni.visco@fondazione.uniroma1.it (G.V.); mauro.tomassetti@uniroma1.it (M.T.);  
lucaugo.fontanella@uniroma1.it (L.U.F.); mariapia.sammartino@uniroma1.it (M.P.S.)  
\* Correspondence: emanuele.dell.aglio@gmail.com

## List of files

*Fig-S1\_Massimo-Banzi\_David-Cuartielles\_Tom-Igoe\_Gianluca-Martino\_David-Mellis.jpg* (photo of the Arduino's team in 2005)

*Fig-S2\_NTC-beta-equation.png* (the equation of a typical NTC temperature sensor)

*Fig-S3\_ohm-temperature\_100K-NTC.png* (curve describing the equation of NTC temperature sensor)

*Fig-S4\_noise-shoot-in-air.png* (noise coming from shield/electrodes without R2-C2 low pass filter and without measures average, useful to apply oversampling, here 2 bits, and decimation technique)

*Fig-S5\_the-shield-with-letter.jpg* (photo of the PCB shield with all electronics components fitted and with letter code)

*Fig-S6\_the-electrodes-with-letter.jpg* (photo of the 2 sides of PCB electrode with component fitted)

*How-to-build-it-R2.doc* (very detailed description, step by step, of the complete prototype construction starting from the list of components and how to buy it)

*Arduino-cond-temp-the-circuits.doc* (detailed description of the electronic components used for the construction of the 2 circuits (shield and electrode))

*the-electrode-PCB.ZIP* (.zip file with all Gerber (Extended Gerber RS274X Version) files to build the PCB for electrode)

*the-shield-PCB.ZIP* (.zip file with all Gerber (Extended Gerber RS274X Version) files to build the Shield supporting external components)

*Conduct-temp1.2.ino* (software to be upload in Arduino UNO R3 board. The sketch was produced with IDE 1.8.9 and is compatible with newer release)

*in-Air-and-Tap-Water.txt* (data file in output from the Arduino board when electrode is immersed in air, up to n.21 and in tap water from n.25 respectively)

*Temperature-Calib-1.2.XLS* (values obtained for the temperature calibration and formulae to calculate the curve parameters)

*Electrode-Calibration.XLS* (values obtained from 38 sample of waters at different conductivity. Can be used as a starting point to set the resolution with the Excel software "Solver" module, as shown many time in the literature)

*Supporting-Materials-file-list.doc* (this file)
